# Supplementary material
Source: PubMed Central journal article supplement (PMC454178)
Supplement: pnas_101_27_10137__1.pdf [file pnas_101_27_10137__1.pdf]

**Table 1. NF- $\kappa$ B activity in tumor specimens determined by EMSA**

| <b>Tumor</b>                               | <b>Number</b> | <b>Histology</b> | <b>Grade*</b> | <b>NF-<math>\kappa</math>B activity (EMSA)<sup>†</sup></b> | <b>Number positive (%)<sup>‡</sup></b> | <b>Lymphocytic infiltrate (%)<sup>§</sup></b> |
|--------------------------------------------|---------------|------------------|---------------|------------------------------------------------------------|----------------------------------------|-----------------------------------------------|
| <b>Class 1: ER-negative/ErbB2-positive</b> | 7             |                  |               |                                                            | 6 (85.7%)                              | 2 (33.3%)                                     |
| 72                                         |               | Ductal           | III           | +++                                                        |                                        | +++                                           |
| 196                                        |               | Ductal           | III           | ++                                                         |                                        | ++                                            |
| 292                                        |               | Ductal           | III           | +/-                                                        |                                        | +                                             |
| 312                                        |               | Ductal           | III           | ++                                                         |                                        | +                                             |
| 151                                        |               | Ductal           | III           | ++                                                         |                                        | +                                             |
| 187                                        |               | Ductal           | III           | ++                                                         |                                        | ND                                            |
| 325                                        |               | Ductal           | III           | ++                                                         |                                        | +                                             |
| <b>Class 2: ER-negative/ErbB2-negative</b> | 9             |                  |               |                                                            | 3 (33.3%)                              | 7 (77.7%)                                     |
| 156                                        |               | Ductal           | III           | +/-                                                        |                                        | +                                             |
| 281                                        |               | Ductal           | II            | ++                                                         |                                        | ++                                            |
| 288                                        |               | Ductal           | III           | +++                                                        |                                        | +++                                           |
| 21                                         |               | Ductal           | III           | +/-                                                        |                                        | ++                                            |
| 182                                        |               | Ductal           | III           | +/-                                                        |                                        | ++                                            |
| 214                                        |               | Ductal           | II            | +/-                                                        |                                        | +++                                           |
| 265                                        |               | Ductal           | III           | +/-                                                        |                                        | +++                                           |

| <b>Tumor</b>                                | <b>Number</b> | <b>Histology</b>   | <b>Grade*</b> | <b>NF-κB activity (EMSA)<sup>†</sup></b> | <b>Number positive (%)<sup>‡</sup></b> | <b>Lymphocytic infiltrate (%)<sup>§</sup></b> |
|---------------------------------------------|---------------|--------------------|---------------|------------------------------------------|----------------------------------------|-----------------------------------------------|
| 330                                         |               | Ductal             | III           | ++                                       |                                        | +                                             |
| 316                                         |               | Ductal             | III           | +/-                                      |                                        | +++                                           |
| <b>Class 3: ER-positive /ErbB2-positive</b> | 8             |                    |               |                                          | 1 (12.5%)                              | 3 (50%)                                       |
| 65                                          |               | Ductal             | III           | +/-                                      |                                        | ND                                            |
| 96                                          |               | Ductal             | III           | +/-                                      |                                        | ND                                            |
| 267                                         |               | Ductal             | III           | +                                        |                                        | ++                                            |
| 283                                         |               | Ductal             | III           | +/-                                      |                                        | +                                             |
| 295                                         |               | Ductal             | II            | +/-                                      |                                        | +++                                           |
| 302                                         |               | Lobular            | II            | +/-                                      |                                        | +                                             |
| 169                                         |               | Ductal             | III           | +/-                                      |                                        | +                                             |
| 24                                          |               | Ductal             | I             | +/-                                      |                                        | ++                                            |
| <b>Class 4: ER-positive /ErbB2-negative</b> | 7             |                    |               |                                          | 1 (14%)                                | 2 (33.3%)                                     |
| 4                                           |               | Ductal             | III           | +/-                                      |                                        | ++                                            |
| 55                                          |               | Ductal             | III           | +/-                                      |                                        | +                                             |
| 84                                          |               | Ductal             | III           | +/-                                      |                                        | +                                             |
| 86                                          |               | Mixed <sup>e</sup> | II            | +                                        |                                        | ++                                            |
| 175                                         |               | Ductal             | II            | +/-                                      |                                        | +                                             |
| 300                                         |               | Mixed              | II            | +                                        |                                        | ND                                            |

| <b>Tumor</b> | <b>Number</b> | <b>Histology</b> | <b>Grade*</b> | <b>NF-κB activity (EMSA)<sup>†</sup></b> | <b>Number positive (%)<sup>‡</sup></b> | <b>Lymphocytic infiltrate (%)<sup>§</sup></b> |
|--------------|---------------|------------------|---------------|------------------------------------------|----------------------------------------|-----------------------------------------------|
| 194          |               | Lobular          | II            | +/-                                      |                                        | +                                             |

\*Modified Bloom–Richardson grade, reported clinically.

<sup>†</sup>Activity of NF-κB determined by EMSA and quantified by densitometry. The results were divided into quartiles, with +++ representing values in the highest quartile and +/- representing values in the lowest quartile of band intensity.

<sup>‡</sup>Tumors with NF-κB activity in the top three quartiles (+, ++, or +++) are called “positive” (examples shown in Fig. 1).

<sup>§</sup>Lymphocytic infiltrate was graded blindly and scored as heavy (+++), moderate (++), or scant lymphocytic infiltrate present (+).

$\chi^2$  Test:

ER-negative vs. ER-positive,  $P = 0.012$

Class 1 vs. ER-positive pooled,  $P = 0.001$

Class 2 vs. ER-positive pooled,  $P = 0.24$

Class 1 vs. Class 2,  $P = 0.036$
